# Supplementary material for: Highly variable iron content modulates iceberg-ocean fertilisation and potential carbon export
Source: Nat Commun. 2019 Nov 20;10:5261. doi: 10.1038/s41467-019-13231-0 (PMC6868171; doi:10.1038/s41467-019-13231-0)
Supplement: Supplementary file 3 — Source Data File [file 41467_2019_13231_MOESM3_ESM.xlsx]

## Sheet: Sheet1
Sample	Month / Year	Location	Region	Total dissolvable Fe / nM	Data origin
1	May 2014	Godthåbsfjord	Greenland	145.513	Hopwood, M. J. et al. Front. Earth Sci. 4 (2016)
2	May 2014	Godthåbsfjord	Greenland	88.1864	Hopwood, M. J. et al. Front. Earth Sci. 4 (2016)
3	May 2014	Godthåbsfjord	Greenland	137.785	Hopwood, M. J. et al. Front. Earth Sci. 4 (2016)
4	May 2014	Godthåbsfjord	Greenland	94.8204	Hopwood, M. J. et al. Front. Earth Sci. 4 (2016)
5	May 2014	Godthåbsfjord	Greenland	38.9805	Hopwood, M. J. et al. Front. Earth Sci. 4 (2016)
6	May 2014	Godthåbsfjord	Greenland	712.81	Hopwood, M. J. et al. Front. Earth Sci. 4 (2016)
7	May 2014	Godthåbsfjord	Greenland	36.5206	Hopwood, M. J. et al. Front. Earth Sci. 4 (2016)
8	May 2014	Godthåbsfjord	Greenland	1487.35	Hopwood, M. J. et al. Front. Earth Sci. 4 (2016)
9	May 2014	Godthåbsfjord	Greenland	19.0132	Hopwood, M. J. et al. Front. Earth Sci. 4 (2016)
1	July 2015	Godthåbsfjord	Greenland	35.3778	new
2	July 2015	Godthåbsfjord	Greenland	10.8513	new
3	July 2015	Godthåbsfjord	Greenland	60.6498	new
4	July 2015	Godthåbsfjord	Greenland	23.7621	new
5	July 2015	Godthåbsfjord	Greenland	22.7575	new
6	July 2015	Godthåbsfjord	Greenland	27.5422	new
7	July 2015	Godthåbsfjord	Greenland	11.8709	new
8	July 2015	Godthåbsfjord	Greenland	24.5531	new
9	July 2015	Godthåbsfjord	Greenland	2.12315	new
10	July 2015	Godthåbsfjord	Greenland	10.4618	new
11	July 2015	Godthåbsfjord	Greenland	49.9396	new
12	July 2015	Godthåbsfjord	Greenland	16.5825	new
13	July 2015	Godthåbsfjord	Greenland	2636.55	new
14	July 2015	Godthåbsfjord	Greenland	135.522	new
15	July 2015	Godthåbsfjord	Greenland	97.3702	new
16	July 2015	Godthåbsfjord	Greenland	22.7607	new
17	July 2015	Godthåbsfjord	Greenland	1019.01	new
18	July 2015	Godthåbsfjord	Greenland	4159.88	new
19	July 2015	Godthåbsfjord	Greenland	2396.92	new
20	July 2015	Godthåbsfjord	Greenland	4.54048	new
21	July 2015	Godthåbsfjord	Greenland	151.823	new
1	July 2015	Kongsfjorden	Svalbard	260.973	Hopwood, M. J. et al. Geochemical Perspect. Lett. 3, 200–209 (2017)
2	July 2015	Kongsfjorden	Svalbard	96.9578	Hopwood, M. J. et al. Geochemical Perspect. Lett. 3, 200–209 (2017)
3	July 2015	Kongsfjorden	Svalbard	368.698	Hopwood, M. J. et al. Geochemical Perspect. Lett. 3, 200–209 (2017)
4	July 2015	Kongsfjorden	Svalbard	1012.62	Hopwood, M. J. et al. Geochemical Perspect. Lett. 3, 200–209 (2017)
5	July 2015	Kongsfjorden	Svalbard	331.046	Hopwood, M. J. et al. Geochemical Perspect. Lett. 3, 200–209 (2017)
6	July 2015	Kongsfjorden	Svalbard	133.242	Hopwood, M. J. et al. Geochemical Perspect. Lett. 3, 200–209 (2017)
7	July 2015	Kongsfjorden	Svalbard	377.217	Hopwood, M. J. et al. Geochemical Perspect. Lett. 3, 200–209 (2017)
8	July 2015	Kongsfjorden	Svalbard	108.735	Hopwood, M. J. et al. Geochemical Perspect. Lett. 3, 200–209 (2017)
9	July 2015	Kongsfjorden	Svalbard	54.2915	Hopwood, M. J. et al. Geochemical Perspect. Lett. 3, 200–209 (2017)
10	July 2015	Kongsfjorden	Svalbard	896.668	Hopwood, M. J. et al. Geochemical Perspect. Lett. 3, 200–209 (2017)
11	July 2015	Kongsfjorden	Svalbard	2273.88	Hopwood, M. J. et al. Geochemical Perspect. Lett. 3, 200–209 (2017)
12	July 2015	Kongsfjorden	Svalbard	470.42	Hopwood, M. J. et al. Geochemical Perspect. Lett. 3, 200–209 (2017)
13	July 2015	Kongsfjorden	Svalbard	23259.5	Hopwood, M. J. et al. Geochemical Perspect. Lett. 3, 200–209 (2017)
14	July 2015	Kongsfjorden	Svalbard	221.402	Hopwood, M. J. et al. Geochemical Perspect. Lett. 3, 200–209 (2017)
15	July 2015	Kongsfjorden	Svalbard	48.7047	Hopwood, M. J. et al. Geochemical Perspect. Lett. 3, 200–209 (2017)
16	July 2015	Kongsfjorden	Svalbard	59.0531	Hopwood, M. J. et al. Geochemical Perspect. Lett. 3, 200–209 (2017)
17	July 2015	Kongsfjorden	Svalbard	61.7159	Hopwood, M. J. et al. Geochemical Perspect. Lett. 3, 200–209 (2017)
18	July 2015	Kongsfjorden	Svalbard	46.369	Hopwood, M. J. et al. Geochemical Perspect. Lett. 3, 200–209 (2017)
19	July 2015	Kongsfjorden	Svalbard	65.2096	Hopwood, M. J. et al. Geochemical Perspect. Lett. 3, 200–209 (2017)
20	July 2015	Kongsfjorden	Svalbard	78.7785	Hopwood, M. J. et al. Geochemical Perspect. Lett. 3, 200–209 (2017)
21	July 2015	Kongsfjorden	Svalbard	57400.7	Hopwood, M. J. et al. Geochemical Perspect. Lett. 3, 200–209 (2017)
22	July 2015	Kongsfjorden	Svalbard	76.7543	Hopwood, M. J. et al. Geochemical Perspect. Lett. 3, 200–209 (2017)
23	July 2015	Kongsfjorden	Svalbard	155.511	Hopwood, M. J. et al. Geochemical Perspect. Lett. 3, 200–209 (2017)
24	July 2015	Kongsfjorden	Svalbard	98.5513	Hopwood, M. J. et al. Geochemical Perspect. Lett. 3, 200–209 (2017)
25	July 2015	Kongsfjorden	Svalbard	107.41	Hopwood, M. J. et al. Geochemical Perspect. Lett. 3, 200–209 (2017)
26	July 2015	Kongsfjorden	Svalbard	87.5296	Hopwood, M. J. et al. Geochemical Perspect. Lett. 3, 200–209 (2017)
27	July 2015	Kongsfjorden	Svalbard	830.384	Hopwood, M. J. et al. Geochemical Perspect. Lett. 3, 200–209 (2017)
28	July 2015	Kongsfjorden	Svalbard	10875.8	Hopwood, M. J. et al. Geochemical Perspect. Lett. 3, 200–209 (2017)
1	July 2016	E Greenland	Greenland	45.072	new
2	July 2016	E Greenland	Greenland	40.7688	new
3	July 2016	E Greenland	Greenland	113.157	new
4	July 2016	E Greenland	Greenland	47.6336	new
5	July 2016	E Greenland	Greenland	43.8442	new
6	July 2016	E Greenland	Greenland	3477.48	new
7	July 2016	E Greenland	Greenland	120.56	new
8	July 2016	E Greenland	Greenland	214.141	new
9	July 2016	E Greenland	Greenland	12.286	new
10	July 2016	E Greenland	Greenland	14.0104	new
11	July 2016	E Greenland	Greenland	974.661	new
12	July 2016	E Greenland	Greenland	32.118	new
13	July 2016	E Greenland	Greenland	63.1044	new
14	July 2016	E Greenland	Greenland	42.8796	new
17	July 2016	E Greenland	Greenland	98.4435	new
18	July 2016	E Greenland	Greenland	1757.7	new
19	July 2016	E Greenland	Greenland	1243.57	new
20	July 2016	E Greenland	Greenland	134.609	new
21	July 2016	E Greenland	Greenland	285.655	new
22	July 2016	E Greenland	Greenland	684.114	new
23	July 2016	E Greenland	Greenland	215.518	new
24	July 2016	E Greenland	Greenland	421.564	new
25	July 2016	E Greenland	Greenland	123.183	new
	August 2016	79° North	Greenland	36.32	new
1	August 2016	Eqip Glacier	Greenland	268.947	new
2	August 2016	Eqip Glacier	Greenland	195.789	new
3	August 2016	Eqip Glacier	Greenland	317.653	new
4	August 2016	Eqip Glacier	Greenland	158.307	new
1	August 2016	Ilulissat	Greenland	54.8126	new
2	August 2016	Ilulissat	Greenland	29.766	new
1	August 2016	Kongsfjorden	Svalbard	1322.51	new
2	August 2016	Kongsfjorden	Svalbard	3821.97	new
3	August 2016	Kongsfjorden	Svalbard	102.603	new
4	August 2016	Kongsfjorden	Svalbard	242.608	new
5	August 2016	Kongsfjorden	Svalbard	1154.48	new
6	August 2016	Kongsfjorden	Svalbard	2701.31	new
7	August 2016	Kongsfjorden	Svalbard	103.244	new
8	August 2016	Kongsfjorden	Svalbard	108.868	new
9	August 2016	Kongsfjorden	Svalbard	198.615	new
10	August 2016	Kongsfjorden	Svalbard	154.765	new
11	August 2016	Kongsfjorden	Svalbard	85.0408	new
12	August 2016	Kongsfjorden	Svalbard	38.7558	new
13	August 2016	Kongsfjorden	Svalbard	273.239	new
14	August 2016	Kongsfjorden	Svalbard	46.1063	new
15	August 2016	Kongsfjorden	Svalbard	393.218	new
16	August 2016	Kongsfjorden	Svalbard	197.518	new
17	August 2016	Kongsfjorden	Svalbard	26.0983	new
18	August 2016	Kongsfjorden	Svalbard	192.058	new
19	August 2016	Kongsfjorden	Svalbard	3763.24	new
20	August 2016	Kongsfjorden	Svalbard	137.418	new
1	August 2016	Upernavik	Greenland	45.8967	new
2	August 2016	Upernavik	Greenland	5087.49	new
3	August 2016	Upernavik	Greenland	86.0342	new
4	August 2016	Upernavik	Greenland	914.073	new
5	August 2016	Upernavik	Greenland	199.85	new
6	August 2016	Upernavik	Greenland	53.8867	new
7	August 2016	Upernavik	Greenland	18.4038	new
8	August 2016	Upernavik	Greenland	30617.3	new
9	August 2016	Upernavik	Greenland	244214	new
1	August 2016	Uumanaaq	Greenland	47.1368	new
2	August 2016	Uumanaaq	Greenland	62.2893	new
3	August 2016	Uumanaaq	Greenland	93.9343	new
4	August 2016	Uumanaaq	Greenland	97.7024	new
5	August 2016	Uumanaaq	Greenland	39.5717	new
6	August 2016	Uumanaaq	Greenland	71.4661	new
7	August 2016	Uumanaaq	Greenland	49.1987	new
8	August 2016	Uumanaaq	Greenland	49.5337	new
1	September 2016	Jökulsárlón	Iceland	41229.7	new
2	September 2016	Jökulsárlón	Iceland	219745	new
3	September 2016	Jökulsárlón	Iceland	92528.3	new
4	September 2016	Jökulsárlón	Iceland	6155.96	new
5	September 2016	Jökulsárlón	Iceland	7305.8	new
6	September 2016	Jökulsárlón	Iceland	67594	new
7	September 2016	Jökulsárlón	Iceland	173849	new
8	September 2016	Jökulsárlón	Iceland	1.93134e+06	new
9	September 2016	Jökulsárlón	Iceland	229298	new
1	January 2017	Maxwell Bay	Antarctica	82.5954	Höfer, J. et al. Prog. Oceanogr., 174, 105–116 (2019)
2	January 2017	Maxwell Bay	Antarctica	778.214	Höfer, J. et al. Prog. Oceanogr., 174, 105–116 (2019)
3	January 2017	Maxwell Bay	Antarctica	1120.1	Höfer, J. et al. Prog. Oceanogr., 174, 105–116 (2019)
4	January 2017	Maxwell Bay	Antarctica	95.7324	Höfer, J. et al. Prog. Oceanogr., 174, 105–116 (2019)
5	January 2017	Maxwell Bay	Antarctica	140.489	Höfer, J. et al. Prog. Oceanogr., 174, 105–116 (2019)
6	January 2017	Maxwell Bay	Antarctica	91.0984	Höfer, J. et al. Prog. Oceanogr., 174, 105–116 (2019)
7	January 2017	Maxwell Bay	Antarctica	430.23	Höfer, J. et al. Prog. Oceanogr., 174, 105–116 (2019)
1	February 2017	South Bay	Antarctica	36.9181	Höfer, J. et al. Prog. Oceanogr., 174, 105–116 (2019)
2	February 2017	South Bay	Antarctica	14.2896	Höfer, J. et al. Prog. Oceanogr., 174, 105–116 (2019)
3	February 2017	South Bay	Antarctica	93.2117	Höfer, J. et al. Prog. Oceanogr., 174, 105–116 (2019)
4	February 2017	South Bay	Antarctica	11.6832	Höfer, J. et al. Prog. Oceanogr., 174, 105–116 (2019)
5	February 2017	South Bay	Antarctica	726.125	Höfer, J. et al. Prog. Oceanogr., 174, 105–116 (2019)
6	February 2017	South Bay	Antarctica	7.09185	Höfer, J. et al. Prog. Oceanogr., 174, 105–116 (2019)
7	February 2017	South Bay	Antarctica	12.1458	Höfer, J. et al. Prog. Oceanogr., 174, 105–116 (2019)
1	October 2016	Pia	Patagonia	521.017	new
2	October 2016	Pia	Patagonia	602.513	new
3	October 2016	Pia	Patagonia	496.016	new
4	October 2016	Pia	Patagonia	1837.45	new
5	October 2016	Pia	Patagonia	158.087	new
6	October 2016	Pia	Patagonia	190.328	new
7	October 2016	Pia	Patagonia	230.89	new
8	October 2016	Pia	Patagonia	110.815	new
1	July 2017	Pia	Patagonia	267.066	new
2	July 2017	Pia	Patagonia	205.442	new
3	July 2017	Pia	Patagonia	167.056	new
4	July 2017	Pia	Patagonia	202.04	new
5	July 2017	Pia	Patagonia	727.104	new
6	July 2017	Pia	Patagonia	352.775	new
7	July 2017	Pia	Patagonia	369.258	new
1	January 2018	Maxwell Bay	Antarctica	1243.84	new
2	January 2018	Maxwell Bay	Antarctica	804.364	new
3	January 2018	Maxwell Bay	Antarctica	1345.27	new
4	January 2018	Maxwell Bay	Antarctica	1205.13	new
5	January 2018	Maxwell Bay	Antarctica	666.795	new
6	January 2018	Maxwell Bay	Antarctica	4533.9	new
7	January 2018	Maxwell Bay	Antarctica	587.382	new
8	January 2018	Maxwell Bay	Antarctica	3537.14	new
9	January 2018	Maxwell Bay	Antarctica	547.474	new
10	January 2018	Maxwell Bay	Antarctica	185.63	new
11	January 2018	Maxwell Bay	Antarctica	544.2	new
12	January 2018	Maxwell Bay	Antarctica	7708.97	new
13	January 2018	Maxwell Bay	Antarctica	1329.85	new
14	January 2018	Maxwell Bay	Antarctica	1.08277e+06	new
15	January 2018	Maxwell Bay	Antarctica	52040.5	new
16	January 2018	Maxwell Bay	Antarctica	4012.3	new
17	January 2018	Maxwell Bay	Antarctica	1576.24	new
18	January 2018	Maxwell Bay	Antarctica	244.11	new
19	January 2018	Maxwell Bay	Antarctica	623.469	new
1	February 2018	South Bay	Antarctica	151732	new
2	February 2018	South Bay	Antarctica	55.4012	new
3	February 2018	South Bay	Antarctica	67.2965	new
4	February 2018	South Bay	Antarctica	5.86517	new
5	February 2018	South Bay	Antarctica	48.2439	new
6	February 2018	South Bay	Antarctica	110.525	new
7	February 2018	South Bay	Antarctica	380.478	new
8	February 2018	South Bay	Antarctica	11736.4	new
9	February 2018	South Bay	Antarctica	1753.71	new
10	February 2018	South Bay	Antarctica	1520.62	new
11	February 2018	South Bay	Antarctica	73.5977	new
12	February 2018	South Bay	Antarctica	231.94	new
13	February 2018	South Bay	Antarctica	1444.72	new
14	February 2018	South Bay	Antarctica	836.908	new
15	February 2018	South Bay	Antarctica	651.302	new
16	February 2018	South Bay	Antarctica	47.0881	new
17	February 2018	South Bay	Antarctica	88.3266	new
18	February 2018	South Bay	Antarctica	13083.2	new
19	February 2018	South Bay	Antarctica	29.6347	new
		Baffin Bay	Greenland	292.237	Campbell, J. A. and Yeats, Oceanol. Acta, 5(2) (1982)
		Drake Passage	Antarctica	25.9	Martin, J. H., Gordon, R. M. and Fitzwater, Nature, 345, 156–158 (1990)
1		South Atlantic, Polar Front	Antarctica	26.3	Loscher, B. M. et al. Deep. Res. Part Ii-Topical Stud. Oceanogr., 44(1–2), 143–187 (1997)
2		South Atlantic, Polar Front	Antarctica	10.8	Loscher, B. M. et al. Deep. Res. Part Ii-Topical Stud. Oceanogr., 44(1–2), 143–187 (1997)
		South Atlantic, Polar Front	Antarctica	20.4	De Baar, H. J. W. et al. Nature, 373, 412–415, (1995)
